# Supplementary material for: Functional Independence of Taiwanese Children with Osteogenesis Imperfecta
Source: MDPI journal article supplement (doi:10.3390/jpm12081205), 2022-07-24
Supplement: s1 [file s1]

## Supplementary Tables

Table S1. Detailed surgical profiles of patients

| Patient No. | OI type | No. of fractures | No. of surgery | Total casting time | Surgical methods                                     |
|-------------|---------|------------------|----------------|--------------------|------------------------------------------------------|
| 1           | 1       | 1                | 0              | 1m1d               | Closed reduction                                     |
| 2           | 1       | 4                | 2              | N/A                | CRIF                                                 |
| 3           | 1       | 4                | 1              | 5m5d               | CRIF                                                 |
| 4           | 1       | 1                | 0              | N/A                | -                                                    |
| 5           | 1       | 9                | N/A            | N/A                | N/A                                                  |
| 6           | 1       | 2                | 1              | 2m                 | N/A                                                  |
| 7           | 1       | 2                | 0              | N/A                | -                                                    |
| 8           | 1       | 3                | N/A            | Long-term bracing  | N/A                                                  |
| 9           | 1       | 3                | 1              | N/A                | N/A                                                  |
| 10          | 1       | 0                | 0              | -                  | -                                                    |
| 11          | 1       | 0                | 0              | -                  | -                                                    |
| 12          | 1       | 2                | 0              | 4m6d               | -                                                    |
| 13          | 1       | 3                | 1              | N/A                | CRIF                                                 |
| 14          | 1       | 2                | 0              | 2m23d              | -                                                    |
| 15          | 1       | 0                | 0              | -                  | -                                                    |
| 16          | 1       | 2                | 1              | 1m11d              | CRIF                                                 |
| 17          | 3       | N/A              | N/A            | N/A                | N/A                                                  |
| 18          | 3       | 20+              | N/A            | N/A                | N/A                                                  |
| 19          | 3       | 15               | 11             | N/A                | CRIF, ORIF(Fassier-Duval nail), corrective osteotomy |
| 21          | 3       | N/A              | N/A            | N/A                | N/A                                                  |
| 22          | 3       | 13               | 8              | 15m19d             | ORIF(Fassier-Duval nail), corrective osteotomy       |
| 23          | 4       | 9                | N/A            | N/A                | N/A                                                  |
| 24          | 4       | 2                | 1              | 1m                 | Closed reduction                                     |
| 25          | 4       | 9                | 1              | 4m1d               | CRIF                                                 |
| 26          | 4       | 10+              | 10+            | N/A                | CRIF, ORIF                                           |
| 27          | 4       | 1                | 1              | N/A                | ORIF                                                 |
| 28          | 4       | 10+              | 10+            | N/A                | N/A                                                  |

CRIF, Closed reduction-internal fixation; ORIF, open reduction internal fixation.

Table S2. Pearson correlation coefficients between WeeFIM scores and variables

| Variables       | Age      |                | Age<br>when symptoms began |          | Body height |          |
|-----------------|----------|----------------|----------------------------|----------|-------------|----------|
|                 | <i>r</i> | <i>p value</i> | <i>r</i>                   | <i>p</i> | <i>r</i>    | <i>p</i> |
| Self-care score | 0.45     | 0.82           | 0.35                       | 0.13     | 0.72**      | <0.01    |
| Quotient (%)    | -0.25    | 0.21           | 0.32                       | 0.17     | 0.56**      | <0.01    |
| Mobility score  | -0.19    | 0.36           | 0.28                       | 0.23     | 0.54**      | <0.01    |
| Quotient (%)    | -0.19    | 0.34           | 0.28                       | 0.23     | 0.53        | <0.01    |
| Cognition score | 0.22     | 0.22           | 0.00                       | 0.998    | 0.22        | 0.28     |
| Quotient (%)    | -0.12    | 0.55           | -0.22                      | 0.36     | -0.14       | 0.49     |
| Total score     | -0.05    | 0.81           | 0.32                       | 0.17     | 0.67**      | <0.01    |
| Quotient (%)    | -0.26    | 0.19           | 0.27                       | 0.24     | 0.53**      | <0.01    |

\*\*, statistically significant at  $p=0.01$  level.

Table S3. Pearson correlation coefficients between body height and WeeFIM scores and subscores

| <b>Task</b>     | <b><i>r</i></b> |
|-----------------|-----------------|
| Self-care score | 0.72**          |
| Quotient (%)    | 0.557**         |
| Eating          | .487**          |
| Grooming        | .627**          |
| Bathing         | .712**          |
| Dressing-upper  | .695**          |
| Dressing-lower  | .612**          |
| Toileting       | .584**          |
| Bladder         | .588**          |
| Bowel           | .421*           |
| Mobility score  | 0.536**         |
| Quotient (%)    | 0.529**         |
| Chair transfer  | .545**          |
| Toilet transfer | .573**          |
| Tub transfer    | .494**          |
| Walking         | .417*           |
| Stairs          | .532**          |
| Cognition score | 0.216           |
| Quotient (%)    | -0.137          |
| Total score     | 0.672**         |
| Quotient (%)    | 0.529**         |

\*\*. statistically significant at  $p=0.01$  level.

\*. statistically significant at  $p=0.05$  level.

## Supplementary Figures

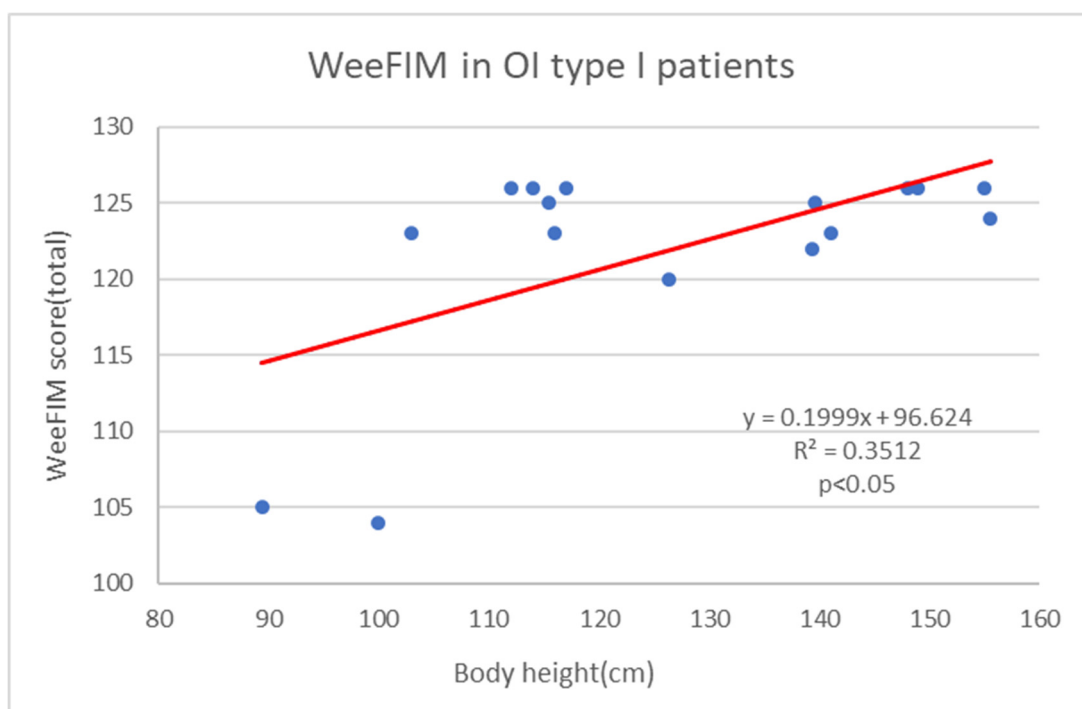

**Figure S1.** Regression analysis between WeeFIM scores and body height in the patients with OI type I
